# Supplementary material for: Strain-induced giant enhancement of anisotropic dielectric constant in layered nitrides SrHfN2 and SrZrN2
Source: Royal Society of Chemistry journal article supplement (doi:10.1039/d3cp01907a), 2023-01-01
Supplement: d3cp01907a1.pdf [file d3cp01907a1.pdf]

## Electronic supplementary information (ESI)

### Strain-induced giant enhancement of anisotropic dielectric constant in layered nitrides SrHfN<sub>2</sub> and SrZrN<sub>2</sub>

Min Yao,<sup>1,2</sup> Yuanyun Zhang,<sup>1</sup> Jianmin Ban,<sup>1</sup> Junjie Hou,<sup>1</sup> Bowen Zhang,<sup>3</sup> Junwei Liu,<sup>3</sup> Xing Ming,<sup>1,2,3\*</sup> Xiaojun Kuang<sup>3†</sup>

1. *College of Science, Guilin University of Technology, Guilin 541004, People's Republic of China*
2. *Key Laboratory of Low-dimensional Structural Physics and Application, Education Department of Guangxi Zhuang Autonomous Region, Guilin University of Technology, Guilin 541004, People's Republic of China*
3. *Key Lab of New Processing Technology for Nonferrous Metal & Materials, Ministry of Education, School of Materials Science and Engineering, Guilin University of Technology, Guilin 541004, China.*

---

\*Email: [kuangxj@glut.edu.cn](mailto:kuangxj@glut.edu.cn)

†Email: [kuangxj@glut.edu.cn](mailto:kuangxj@glut.edu.cn)

**Table S1.** The evolutions of Sr-N, Hf-N and Zr-N bond lengths  $d$  (Å) and octahedral distortion parameters  $\Sigma$  (°) and  $\Theta$  (°) of the SrN<sub>6</sub>, HfN<sub>6</sub> and ZrN<sub>6</sub> octahedra in SrHfN<sub>2</sub> and SrZrN<sub>2</sub> under isotropic strain.

| Strain (%) | SrHfN <sub>2</sub> |          |          |                  |          |          | SrZrN <sub>2</sub> |          |          |                  |          |          |
|------------|--------------------|----------|----------|------------------|----------|----------|--------------------|----------|----------|------------------|----------|----------|
|            | SrN <sub>6</sub>   |          |          | HfN <sub>6</sub> |          |          | SrN <sub>6</sub>   |          |          | ZrN <sub>6</sub> |          |          |
|            | $d$                | $\Sigma$ | $\Theta$ | $d$              | $\Sigma$ | $\Theta$ | $d$                | $\Sigma$ | $\Theta$ | $d$              | $\Sigma$ | $\Theta$ |
| -1.0       | 2.600              | 130.685  | 269.201  | 2.234            | 67.856   | 168.050  | 2.601              | 123.073  | 255.060  | 2.255            | 64.740   | 159.789  |
| -0.9       | 2.603              | 130.924  | 269.642  | 2.236            | 68.138   | 168.801  | 2.604              | 123.303  | 255.488  | 2.257            | 65.017   | 160.519  |
| -0.8       | 2.606              | 131.164  | 270.084  | 2.238            | 68.423   | 169.558  | 2.607              | 123.539  | 255.930  | 2.258            | 65.285   | 161.228  |
| -0.7       | 2.610              | 131.405  | 270.530  | 2.240            | 68.710   | 170.325  | 2.611              | 123.777  | 256.373  | 2.260            | 65.574   | 161.993  |
| -0.6       | 2.613              | 131.648  | 270.978  | 2.241            | 69.001   | 171.101  | 2.614              | 124.013  | 256.814  | 2.262            | 65.847   | 162.716  |
| -0.5       | 2.616              | 131.892  | 271.427  | 2.243            | 69.288   | 171.867  | 2.617              | 124.249  | 257.255  | 2.264            | 66.130   | 163.466  |
| -0.4       | 2.619              | 132.136  | 271.878  | 2.245            | 69.580   | 172.645  | 2.620              | 124.487  | 257.699  | 2.266            | 66.403   | 164.191  |
| -0.3       | 2.622              | 132.381  | 272.329  | 2.247            | 69.871   | 173.424  | 2.623              | 124.724  | 258.140  | 2.268            | 66.688   | 164.947  |
| -0.2       | 2.626              | 132.628  | 272.783  | 2.249            | 70.165   | 174.209  | 2.627              | 124.966  | 258.591  | 2.269            | 66.966   | 165.684  |
| -0.1       | 2.629              | 132.875  | 273.238  | 2.251            | 70.459   | 174.996  | 2.630              | 125.204  | 259.034  | 2.271            | 67.254   | 166.449  |
| 0          | 2.632              | 133.128  | 273.704  | 2.252            | 70.762   | 175.808  | 2.633              | 125.445  | 259.484  | 2.273            | 67.538   | 167.203  |
| 0.1        | 2.635              | 133.376  | 274.161  | 2.254            | 71.057   | 176.598  | 2.636              | 125.688  | 259.935  | 2.275            | 67.825   | 167.968  |

---

|     |       |         |         |       |        |         |       |         |         |       |        |         |
|-----|-------|---------|---------|-------|--------|---------|-------|---------|---------|-------|--------|---------|
| 0.2 | 2.639 | 133.729 | 274.810 | 2.256 | 71.477 | 177.723 | 2.639 | 125.932 | 260.390 | 2.277 | 68.104 | 168.711 |
| 0.3 | 2.642 | 133.986 | 275.283 | 2.258 | 71.785 | 178.550 | 2.642 | 126.176 | 260.844 | 2.279 | 68.401 | 169.502 |
| 0.4 | 2.645 | 134.245 | 275.758 | 2.259 | 72.093 | 179.377 | 2.646 | 126.424 | 261.304 | 2.281 | 68.685 | 170.259 |
| 0.5 | 2.648 | 134.505 | 276.235 | 2.261 | 72.404 | 180.213 | 2.649 | 126.669 | 261.759 | 2.282 | 68.983 | 171.052 |
| 0.6 | 2.652 | 134.765 | 276.713 | 2.263 | 72.716 | 181.050 | 2.652 | 126.919 | 262.224 | 2.284 | 69.273 | 171.827 |
| 0.7 | 2.655 | 135.027 | 277.194 | 2.265 | 73.029 | 181.893 | 2.655 | 127.165 | 262.682 | 2.286 | 69.570 | 172.620 |
| 0.8 | 2.658 | 135.297 | 277.689 | 2.267 | 73.352 | 182.763 | 2.659 | 127.416 | 263.147 | 2.288 | 69.859 | 173.392 |
| 0.9 | 2.661 | 135.450 | 277.970 | 2.268 | 73.534 | 183.255 | 2.662 | 127.666 | 263.611 | 2.290 | 70.162 | 174.201 |
| 1   | 2.665 | 135.830 | 278.667 | 2.270 | 73.990 | 184.483 | 2.665 | 127.919 | 264.080 | 2.292 | 70.454 | 174.983 |
| 1.1 | 2.668 | 136.081 | 279.127 | 2.272 | 74.291 | 185.296 | 2.668 | 128.171 | 264.548 | 2.293 | 70.753 | 175.783 |
| 1.2 | 2.671 | 136.346 | 279.613 | 2.274 | 74.609 | 186.154 | 2.671 | 128.425 | 265.019 | 2.295 | 71.054 | 176.589 |
| 1.3 | 2.674 | 136.590 | 280.058 | 2.275 | 74.901 | 186.943 | 2.675 | 128.680 | 265.491 | 2.297 | 71.356 | 177.399 |
| 1.4 | 2.678 | 136.853 | 280.540 | 2.277 | 75.216 | 187.796 | 2.678 | 128.936 | 265.966 | 2.299 | 71.660 | 178.215 |
| 1.5 | 2.681 | 137.117 | 281.023 | 2.279 | 75.533 | 188.654 | 2.681 | 129.194 | 266.443 | 2.301 | 71.965 | 179.034 |
| 1.6 | 2.684 | 137.382 | 281.508 | 2.281 | 75.851 | 189.515 | 2.684 | 129.453 | 266.922 | 2.302 | 72.273 | 179.860 |

---

**Table S2.** Calculated diagonal components of the dielectric tensors and dielectric constants of SrHfN<sub>2</sub>. The crystal structure becomes unstable when isotropic strain exceeds 1.2%, which results in unreasonable dielectric constants.

| Strain(%) | $\epsilon_{ele}$ |          |          | $\epsilon_{ion}$ |          |          | $\epsilon_r$ |
|-----------|------------------|----------|----------|------------------|----------|----------|--------------|
|           | <i>x</i>         | <i>y</i> | <i>z</i> | <i>x</i>         | <i>y</i> | <i>z</i> |              |
| -1.0      | 12.36            | 12.36    | 11.93    | 125.70           | 125.70   | 46.70    | 111.59       |
| -0.9      | 12.29            | 12.29    | 11.85    | 130.72           | 130.72   | 47.38    | 115.08       |
| -0.8      | 12.22            | 12.22    | 11.77    | 136.27           | 136.27   | 48.09    | 118.94       |
| -0.7      | 12.15            | 12.15    | 12.15    | 142.42           | 142.41   | 48.83    | 123.37       |
| -0.6      | 12.08            | 12.08    | 11.62    | 149.21           | 149.21   | 49.63    | 127.95       |
| -0.5      | 12.02            | 12.02    | 11.55    | 156.80           | 156.80   | 50.47    | 133.22       |
| -0.4      | 11.96            | 11.96    | 11.48    | 165.36           | 165.35   | 51.35    | 139.15       |
| -0.3      | 11.90            | 11.90    | 11.41    | 175.08           | 175.07   | 52.29    | 145.88       |
| -0.2      | 11.84            | 11.84    | 11.35    | 186.16           | 186.16   | 53.28    | 153.55       |
| -0.1      | 11.79            | 11.79    | 11.29    | 198.82           | 198.80   | 54.33    | 162.27       |
| 0         | 11.89            | 11.89    | 11.30    | 217.77           | 217.78   | 56.02    | 175.55       |
| 0.1       | 11.84            | 11.84    | 11.24    | 235.50           | 235.51   | 57.20    | 187.71       |
| 0.2       | 11.78            | 11.78    | 11.19    | 253.88           | 253.87   | 58.55    | 200.35       |
| 0.3       | 11.73            | 11.73    | 11.14    | 278.65           | 278.66   | 59.88    | 217.27       |
| 0.4       | 11.68            | 11.68    | 11.08    | 309.15           | 309.13   | 61.30    | 238.01       |
| 0.5       | 11.63            | 11.63    | 11.03    | 347.65           | 347.61   | 62.82    | 264.13       |
| 0.6       | 11.59            | 11.59    | 10.99    | 398.01           | 397.95   | 64.45    | 298.19       |
| 0.7       | 11.54            | 11.54    | 10.94    | 466.05           | 466.05   | 66.17    | 344.10       |
| 0.8       | 11.50            | 11.50    | 10.90    | 562.14           | 562.04   | 68.02    | 408.70       |
| 0.9       | 11.46            | 11.46    | 10.85    | 735.64           | 735.64   | 69.82    | 524.95       |
| 1         | 11.42            | 11.42    | 10.82    | 969.30           | 968.94   | 72.09    | 681.33       |
| 1.1       | 11.38            | 11.38    | 10.78    | 1553.61          | 1554.54  | 74.32    | 1072.00      |
| 1.2       | 11.34            | 11.34    | 10.74    | 3889.58          | 3878.54  | 76.76    | 2626.10      |
| 1.3       | 11.30            | 11.30    | 10.70    | 1.98             | 1.98     | 79.33    | 38.87        |
| 1.4       | 11.27            | 11.27    | 10.67    | 2.10             | 2.10     | 82.14    | 39.84        |
| 1.5       | 11.23            | 11.23    | 10.63    | 2.20             | 2.20     | 85.17    | 40.89        |
| 1.6       | 11.20            | 11.20    | 10.60    | 2.31             | 2.31     | 88.50    | 42.04        |

**Table S3.** Calculated diagonal components of the dielectric tensors and dielectric constants of SrZrN<sub>2</sub>. The crystal structure becomes unstable when isotropic strain exceeds 0.7%, which results in unreasonable dielectric constants.

| Strain(%) | $\epsilon_{ele}$ |          |          | $\epsilon_{ion}$ |          |          | $\epsilon_r$ |
|-----------|------------------|----------|----------|------------------|----------|----------|--------------|
|           | <i>x</i>         | <i>y</i> | <i>z</i> | <i>x</i>         | <i>y</i> | <i>z</i> |              |
| -1.0      | 13.96            | 13.96    | 12.92    | 183.98           | 183.97   | 50.85    | 153.21       |
| -0.9      | 13.85            | 13.85    | 12.80    | 193.45           | 193.45   | 51.54    | 159.65       |
| -0.8      | 13.75            | 13.75    | 12.70    | 204.09           | 203.87   | 52.27    | 166.81       |
| -0.7      | 13.92            | 13.92    | 12.73    | 222.67           | 222.64   | 53.87    | 179.92       |
| -0.6      | 13.82            | 13.82    | 12.63    | 236.96           | 237.03   | 54.69    | 189.65       |
| -0.5      | 13.72            | 13.72    | 12.53    | 253.72           | 253.69   | 55.57    | 200.98       |
| -0.4      | 13.63            | 13.63    | 12.43    | 273.29           | 273.28   | 56.49    | 214.25       |
| -0.3      | 13.53            | 13.53    | 12.34    | 297.00           | 297.11   | 57.47    | 230.33       |
| -0.2      | 13.45            | 13.45    | 12.25    | 325.24           | 324.16   | 58.51    | 249.02       |
| -0.1      | 13.37            | 13.37    | 12.17    | 360.05           | 359.08   | 59.61    | 272.55       |
| 0         | 13.29            | 13.29    | 12.09    | 403.74           | 403.74   | 60.79    | 302.31       |
| 0.1       | 13.21            | 13.21    | 12.01    | 461.39           | 460.57   | 62.04    | 340.81       |
| 0.2       | 13.13            | 13.13    | 11.94    | 537.80           | 539.75   | 63.36    | 393.04       |
| 0.3       | 13.06            | 13.06    | 11.87    | 647.85           | 647.66   | 64.78    | 466.10       |
| 0.4       | 12.99            | 12.99    | 11.80    | 817.28           | 814.73   | 66.29    | 578.70       |
| 0.5       | 12.93            | 12.93    | 11.73    | 1104.54          | 1104.42  | 67.89    | 771.48       |
| 0.6       | 12.87            | 12.87    | 11.67    | 1723.03          | 1699.23  | 69.60    | 1176.42      |
| 0.7       | 12.80            | 12.80    | 11.61    | 4019.66          | 4017.37  | 71.44    | 2715.23      |
| 0.8       | 12.74            | 12.74    | 11.55    | 1.17             | 1.17     | 73.40    | 37.60        |
| 0.9       | 12.69            | 12.69    | 11.50    | 1.26             | 1.26     | 75.53    | 38.31        |
| 1         | 12.63            | 12.63    | 11.44    | 1.35             | 1.35     | 77.77    | 39.06        |
| 1.1       | 12.58            | 12.58    | 11.39    | 1.44             | 1.43     | 80.21    | 39.88        |
| 1.2       | 12.53            | 12.53    | 11.34    | 1.52             | 1.52     | 82.81    | 40.75        |
| 1.3       | 12.48            | 12.48    | 11.30    | 1.61             | 1.61     | 85.70    | 41.73        |
| 1.4       | 12.43            | 12.43    | 11.25    | 1.69             | 1.69     | 88.76    | 42.75        |
| 1.5       | 12.38            | 12.38    | 11.21    | 1.79             | 1.79     | 92.16    | 43.91        |
| 1.6       | 12.34            | 12.34    | 11.16    | 1.87             | 1.87     | 95.80    | 45.13        |

**Table S4.** Calculated zone-center phonon frequencies of the three acoustic branches, which including one longitudinal and two transverse acoustic branches (LA, TA1 and TA2), the TA branches show obviously imaginary frequencies when the isotropic strain exceeds 1.2% (0.7%) for SrHfN<sub>2</sub> (SrZrN<sub>2</sub>), indicating the lattice structures of SrHfN<sub>2</sub> and SrZrN<sub>2</sub> become unstable.

| Strain(%) | SrHfN <sub>2</sub>    |                        |                        | SrZrN <sub>2</sub>    |                        |                        |
|-----------|-----------------------|------------------------|------------------------|-----------------------|------------------------|------------------------|
|           | LA(cm <sup>-1</sup> ) | TA1(cm <sup>-1</sup> ) | TA2(cm <sup>-1</sup> ) | LA(cm <sup>-1</sup> ) | TA1(cm <sup>-1</sup> ) | TA2(cm <sup>-1</sup> ) |
| 0.8       |                       |                        |                        | 0.05                  | 13.85                  | 13.85                  |
| 0.9       |                       |                        |                        | 0.05                  | 30.87                  | 30.87                  |
| 1         |                       |                        |                        | 0.05                  | 41.46                  | 41.46                  |
| 1.1       |                       |                        |                        | 0.05                  | 49.77                  | 49.77                  |
| 1.2       |                       |                        |                        | 0.03                  | 56.92                  | 56.92                  |
| 1.3       | 0.02                  | 14.59                  | 14.59                  | 0.05                  | 63.46                  | 63.46                  |
| 1.4       | 0.03                  | 28.59                  | 28.60                  | 0.01                  | 69.22                  | 69.22                  |
| 1.5       | 0.02                  | 37.76                  | 37.77                  | 0.01                  | 74.70                  | 74.70                  |
| 1.6       | 0.02                  | 45.35                  | 45.36                  | 0.02                  | 79.69                  | 79.69                  |

**Table S5.** Mode frequencies  $\omega_\lambda$  (cm<sup>-1</sup>) and effective charges  $\widetilde{Z}_\lambda^*$  (in |e|) of the IR-active modes for SrHfN<sub>2</sub> and SrZrN<sub>2</sub> under isotropic strain. The appearance of imaginary frequencies of the two TA branches is accompanied by the zero-frequency E<sub>u</sub>(2) mode when the strain increases to 1.3% (0.8%) for SrHfN<sub>2</sub> and SrZrN<sub>2</sub>.

| Strain | SrHfN <sub>2</sub> |                           |                  |                           |                  |                           |                  |                           | SrZrN <sub>2</sub> |                           |                  |                           |                  |                           |                  |                           |
|--------|--------------------|---------------------------|------------------|---------------------------|------------------|---------------------------|------------------|---------------------------|--------------------|---------------------------|------------------|---------------------------|------------------|---------------------------|------------------|---------------------------|
|        | A2u(1)             |                           | A2u(2)           |                           | Eu(1)            |                           | Eu(2)            |                           | A2u(1)             |                           | A2u(2)           |                           | Eu(1)            |                           | Eu(2)            |                           |
|        | $\omega_\lambda$   | $\widetilde{Z}_\lambda^*$ | $\omega_\lambda$ | $\widetilde{Z}_\lambda^*$ | $\omega_\lambda$ | $\widetilde{Z}_\lambda^*$ | $\omega_\lambda$ | $\widetilde{Z}_\lambda^*$ | $\omega_\lambda$   | $\widetilde{Z}_\lambda^*$ | $\omega_\lambda$ | $\widetilde{Z}_\lambda^*$ | $\omega_\lambda$ | $\widetilde{Z}_\lambda^*$ | $\omega_\lambda$ | $\widetilde{Z}_\lambda^*$ |
| -1     | 322.78             | 1.31                      | 190.89           | 1.46                      | 175.55           | 3.08                      | 99.33            | 0.41                      | 352.98             | 1.09                      | 194.07           | 1.86                      | 161.34           | 2.81                      | 108.87           | 1.21                      |
| -0.9   | 321.69             | 1.30                      | 188.70           | 1.46                      | 173.16           | 3.03                      | 97.74            | 0.45                      | 351.92             | 1.07                      | 191.82           | 1.86                      | 159.33           | 2.69                      | 106.27           | 1.31                      |
| -0.8   | 320.61             | 1.28                      | 186.51           | 1.46                      | 170.78           | 2.98                      | 96.07            | 0.48                      | 350.93             | 1.06                      | 189.48           | 1.85                      | 157.42           | 2.58                      | 103.78           | 1.40                      |
| -0.7   | 319.54             | 1.26                      | 184.30           | 1.47                      | 168.39           | 2.93                      | 94.34            | 0.52                      | 349.72             | 1.05                      | 186.56           | 1.86                      | 154.90           | 2.46                      | 100.43           | 1.56                      |
| -0.6   | 318.47             | 1.24                      | 182.06           | 1.47                      | 166.01           | 2.88                      | 92.53            | 0.56                      | 348.72             | 1.04                      | 184.19           | 1.86                      | 153.11           | 2.35                      | 97.53            | 1.66                      |
| -0.5   | 317.40             | 1.22                      | 179.80           | 1.47                      | 163.64           | 2.82                      | 90.64            | 0.61                      | 347.70             | 1.03                      | 181.85           | 1.85                      | 151.33           | 2.23                      | 94.31            | 1.76                      |
| -0.4   | 316.34             | 1.21                      | 177.54           | 1.48                      | 161.29           | 2.76                      | 88.64            | 0.66                      | 346.81             | 1.02                      | 179.28           | 1.85                      | 149.64           | 2.13                      | 91.61            | 1.83                      |
| -0.3   | 315.28             | 1.19                      | 175.23           | 1.48                      | 158.94           | 2.69                      | 86.53            | 0.71                      | 345.69             | 1.00                      | 177.08           | 1.84                      | 147.91           | 2.00                      | 87.34            | 1.95                      |
| -0.2   | 314.22             | 1.17                      | 172.91           | 1.48                      | 156.60           | 2.62                      | 84.30            | 0.77                      | 344.75             | 0.99                      | 174.58           | 1.84                      | 146.28           | 1.90                      | 83.95            | 2.04                      |
| -0.1   | 313.18             | 1.16                      | 170.56           | 1.48                      | 154.31           | 2.56                      | 81.95            | 0.83                      | 343.69             | 0.98                      | 172.24           | 1.83                      | 144.67           | 1.79                      | 79.48            | 2.14                      |

|     |        |      |        |      |        |      |       |      |        |      |        |      |        |      |       |      |
|-----|--------|------|--------|------|--------|------|-------|------|--------|------|--------|------|--------|------|-------|------|
| 0   | 311.99 | 1.14 | 167.78 | 1.50 | 151.61 | 2.50 | 79.23 | 0.91 | 342.66 | 0.97 | 169.87 | 1.83 | 143.13 | 1.68 | 74.80 | 2.23 |
| 0.1 | 310.96 | 1.13 | 165.39 | 1.50 | 149.38 | 2.42 | 76.53 | 0.97 | 341.71 | 0.96 | 167.31 | 1.82 | 141.62 | 1.59 | 70.25 | 2.30 |
| 0.2 | 310.01 | 1.11 | 162.82 | 1.50 | 147.26 | 2.35 | 73.98 | 1.03 | 340.64 | 0.95 | 164.96 | 1.82 | 140.18 | 1.49 | 64.34 | 2.39 |
| 0.3 | 308.99 | 1.10 | 160.39 | 1.51 | 145.10 | 2.27 | 70.93 | 1.10 | 339.73 | 0.94 | 162.28 | 1.81 | 138.73 | 1.41 | 59.23 | 2.45 |
| 0.4 | 307.98 | 1.08 | 157.93 | 1.51 | 142.98 | 2.19 | 67.64 | 1.18 | 338.74 | 0.93 | 159.75 | 1.81 | 137.37 | 1.33 | 52.70 | 2.52 |
| 0.5 | 306.97 | 1.07 | 155.42 | 1.51 | 140.89 | 2.10 | 64.07 | 1.25 | 337.76 | 0.92 | 157.15 | 1.81 | 136.03 | 1.26 | 45.32 | 2.58 |
| 0.6 | 305.96 | 1.05 | 152.87 | 1.52 | 138.86 | 2.02 | 60.13 | 1.33 | 336.75 | 0.91 | 154.61 | 1.80 | 134.74 | 1.18 | 35.90 | 2.64 |
| 0.7 | 304.96 | 1.04 | 150.31 | 1.52 | 136.85 | 1.93 | 55.80 | 1.40 | 335.80 | 0.91 | 151.90 | 1.80 | 133.44 | 1.12 | 23.73 | 2.69 |
| 0.8 | 303.98 | 1.03 | 147.72 | 1.52 | 134.93 | 1.84 | 51.02 | 1.48 | 334.82 | 0.90 | 149.24 | 1.79 | 132.21 | 1.06 | 0.08  | 0.00 |
| 0.9 | 302.93 | 1.01 | 145.29 | 1.52 | 133.01 | 1.75 | 44.79 | 1.56 | 333.84 | 0.89 | 146.53 | 1.79 | 130.99 | 1.00 | 0.00  | 0.00 |
| 1   | 302.03 | 1.00 | 142.46 | 1.53 | 131.21 | 1.68 | 39.17 | 1.63 | 332.87 | 0.88 | 143.81 | 1.79 | 129.80 | 0.94 | 0.01  | 0.00 |
| 1.1 | 301.05 | 0.99 | 139.82 | 1.53 | 129.42 | 1.59 | 31.09 | 1.71 | 331.91 | 0.87 | 141.05 | 1.79 | 128.65 | 0.89 | 0.01  | 0.00 |
| 1.2 | 300.08 | 0.98 | 137.09 | 1.53 | 127.67 | 1.51 | 19.71 | 1.78 | 330.96 | 0.86 | 138.25 | 1.78 | 127.53 | 0.85 | 0.09  | 0.00 |
| 1.3 | 299.11 | 0.97 | 134.40 | 1.53 | 125.98 | 1.43 | 0.10  | 0.00 | 329.98 | 0.85 | 135.39 | 1.78 | 126.40 | 0.80 | 0.01  | 0.00 |
| 1.4 | 298.16 | 0.95 | 131.62 | 1.54 | 124.34 | 1.35 | 0.01  | 0.00 | 329.03 | 0.85 | 132.48 | 1.78 | 125.31 | 0.76 | 0.10  | 0.00 |
| 1.5 | 297.22 | 0.94 | 128.82 | 1.54 | 122.76 | 1.28 | 0.02  | 0.00 | 328.06 | 0.84 | 129.53 | 1.78 | 124.23 | 0.73 | 0.00  | 0.00 |
| 1.6 | 296.27 | 0.93 | 125.95 | 1.54 | 121.20 | 1.21 | 0.03  | 0.00 | 327.12 | 0.83 | 126.54 | 1.77 | 123.19 | 0.69 | 0.02  | 0.00 |

---



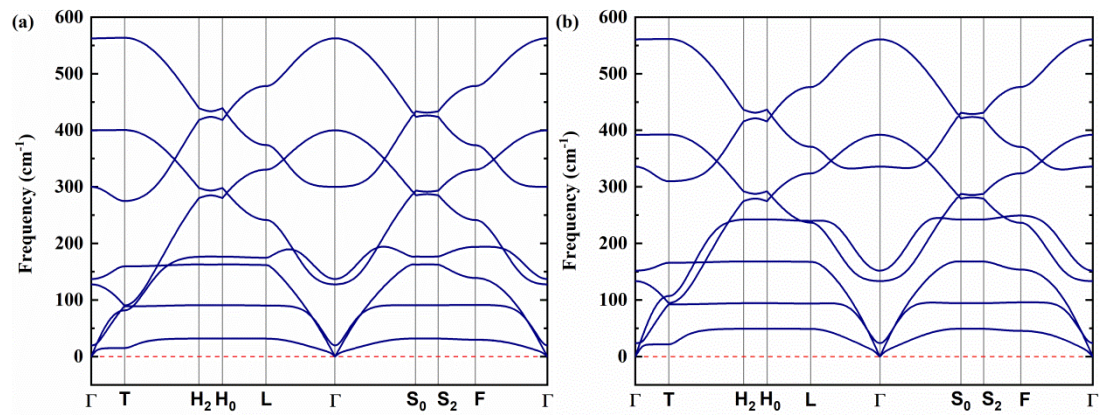

**Figure S1.** The phonon spectra of (a) SrHfN<sub>2</sub> and (b) SrZrN<sub>2</sub> under isotropic strain of 1.2% and 0.7%.

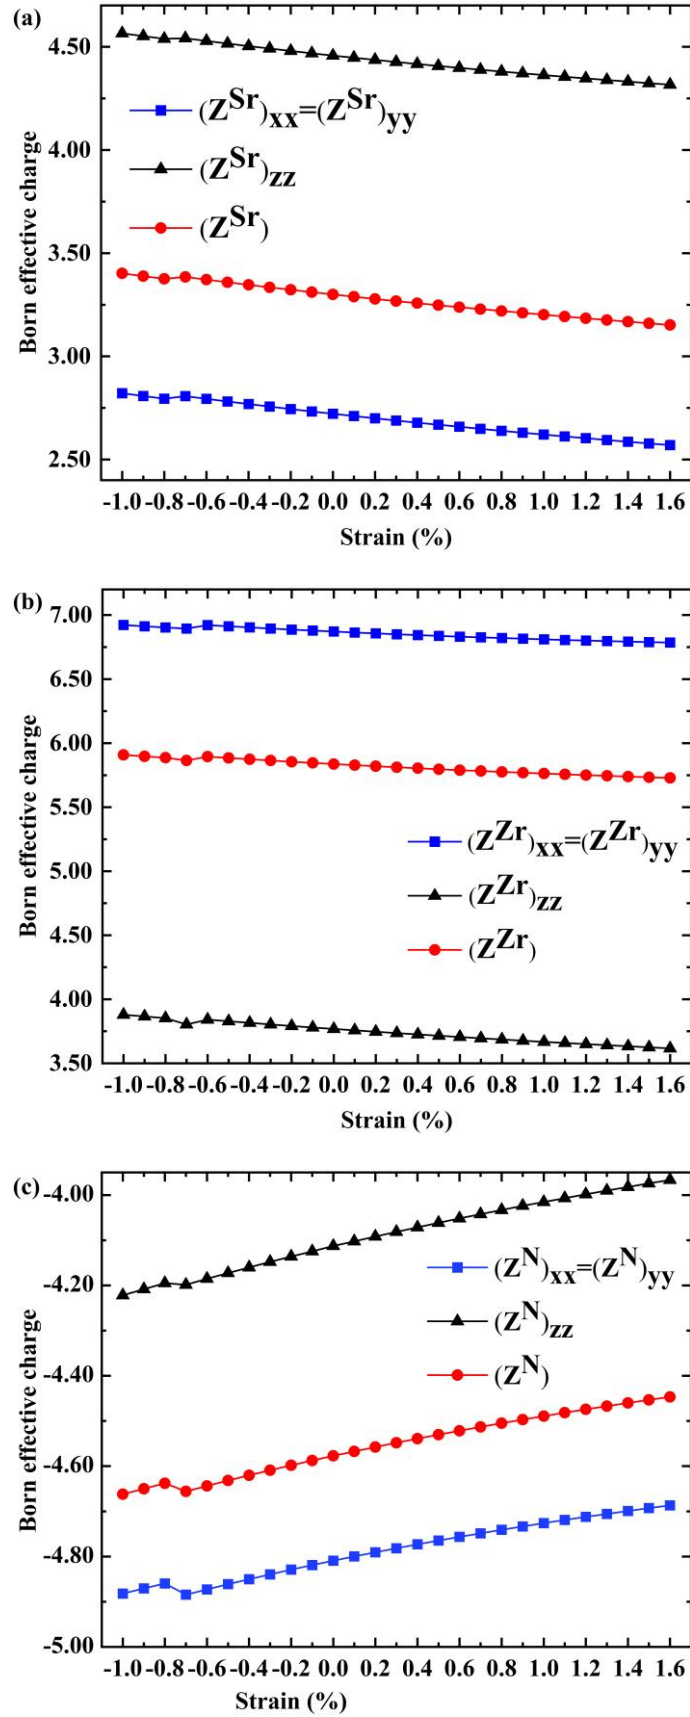

**Figure S2.** Born effective charges components of each element and its average value under isotropic strain for SrZrN<sub>2</sub>: (a) Sr, (b) Zr and (c) N.

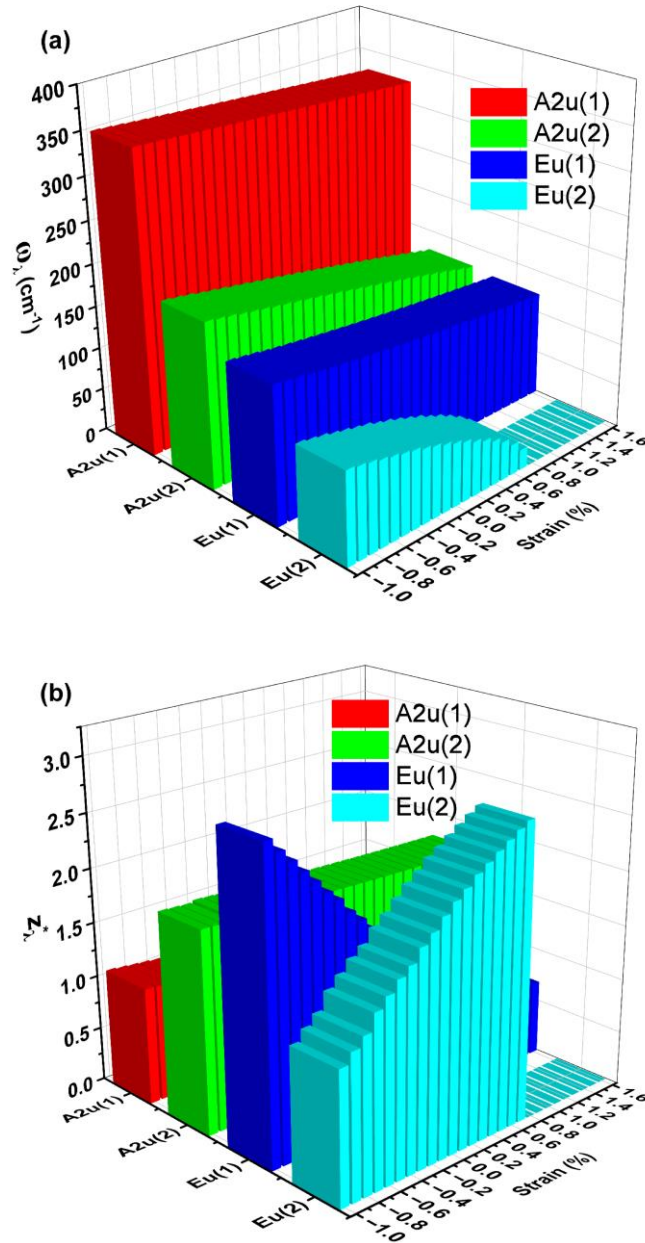

**Figure S3.** (a) Mode frequencies  $\omega_\lambda$  and (b) effective charges  $\widetilde{Z}_\lambda^*$  (in |e|) of the IR-active modes for SrZrN<sub>2</sub> under isotropic strain. The IR activity frequency of the E<sub>u</sub>(2) mode reduces by about 2/3 from 74.7 to 23.7 when the tensile strain increases up to 0.7%, and the corresponding mode effective charge increases by about 20%, leading to a giant dielectric constant of 2700 under 0.7% tensile strain.
